# Supplementary material for: An optimized method for directed differentiation of hypothalamic neural stem cells in a 3D culture system
Source: Research Square preprint supplement (doi:10.21203/rs.3.rs-6022321/v1), 2025-05-06
Supplement: Supplementary file 1 [file 69ed4de9e95fe36d0e9dc9b2.xlsx]

## Sheet: Sheet1
Primers used for quantitative PCR
Nkx2.1
Forward Primer :GTCCTCGGAAAGACAGCATC
Reverse Primer :GTGCTTTGGACTCATCGACA
Tbr1
Forward Primer :GCAGCAGCTACCCACATTC
Reverse Primer :GTCCTTGGAGTCAGGAAAATTGT
Ascl1
Forward Primer :GCAACCGGGTCAAGTTGGT
Reverse Primer: GTCGTTGGAGTAGTTGGGGG
Sox2
Forward Primer :GCGGAGTGGAAACTTTTGTCC
Reverse Primer :CGGGAAGCGTGTACTTATCCTT
Fezf1
Forward Primer :ACGCGACCACCAAAATGCTA
Reverse Primer :TCGACGAGTTGAGATGCAGAG
Gapdh
Forward Primer :CCCATCACCATCTTCCAGGAG
Reverse Primer :GTTGTCATGGATGACCTTGGC
Gnrh1
Forward Primer :AGCACTGGTCCTATGGGTTG
Reverse Primer :GGGGTTCTGCCATTTGATCCA
